# Supplementary material
Source: PubMed Central journal article supplement (PMC9896967)

# Supporting Information

## Subcellular Delivery of Hydrogen Sulfide Using Small Molecule Donors Impacts Organelle Stress

Annie K. Gilbert and Michael D. Pluth\*

Department of Chemistry and Biochemistry  
Materials Science Institute  
Knight Campus for Accelerating Scientific Impact  
Institute of Molecular Biology  
University of Oregon  
Eugene, OR 97403-1253 United States.

Contact Information:

Michael D. Pluth  
pluth@uoregon.edu

| <b>Table of Contents</b>                                                 | <b>Page</b> |
|--------------------------------------------------------------------------|-------------|
| 1. Fluorescence imaging of <b>MitoTCM</b> compared to NaSH               | S2          |
| 2. Fluorescence imaging of <b>MitoTCM</b> compared to <b>TCM alkyne</b>  | S3          |
| 3. Fluorescence imaging of <b>LysoTCM</b> compared to <b>TCM alkyne</b>  | S4          |
| 4. Fluorescence imaging of <b>ERTCM</b> compared to <b>TCM alkyne</b>    | S5          |
| 5. Fluorescence imaging of <b>GolgiTCM</b> compared to <b>TCM alkyne</b> | S6          |
| 6. Selectivity experiment of localized delivery                          | S7          |
| 7. Colocalization negative control experiment                            | S8          |
| 8. Monensin Cell Viability Experiment                                    | S9          |
| 9. NMR Spectra                                                           | S10         |

## 1. Fluorescence imaging of **MitoTCM** compared to NaSH

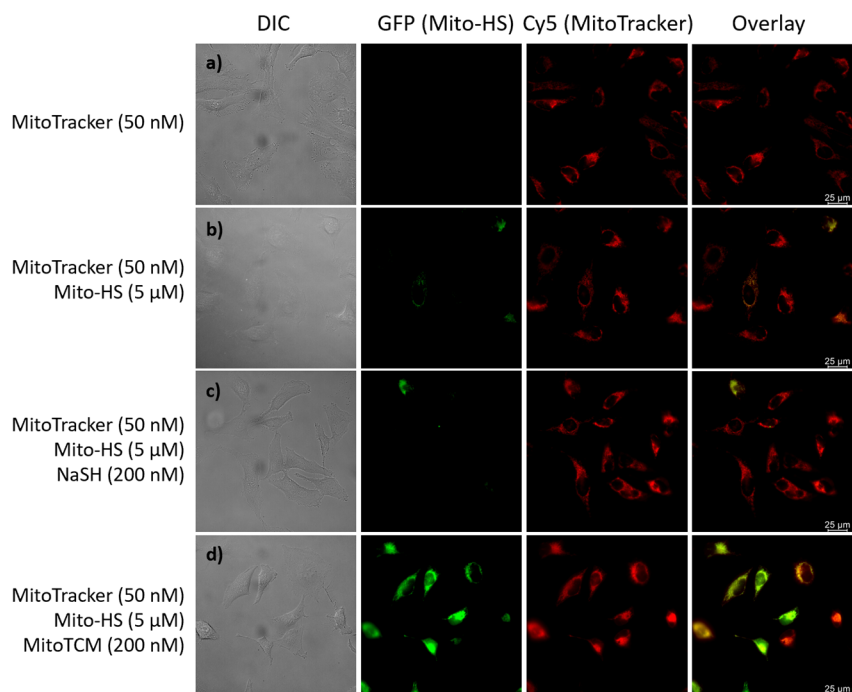

**Figure S1.** Fluorescence imaging of H<sub>2</sub>S produced by **MitoTCM** compared to NaSH in HeLa cells. Cells were incubated with MitoTracker (50 nM) and (a) vehicle (0.5% DMSO), (b) Mito-HS (5 μM), (c) Mito-HS (5 μM) and NaSH (200 nM), (d) Mito-HS (5 μM) and **MitoTCM** (200 nM). Cells were incubated with MitoTracker and vehicle or Mito-HS for 30 minutes, and then either the vehicle, NaSH or **MitoTCM** for 60 min followed by imaging. Bar scale: 25 μm.

## 2. Fluorescence imaging of **MitoTCM** compared to **TCM alkyne**

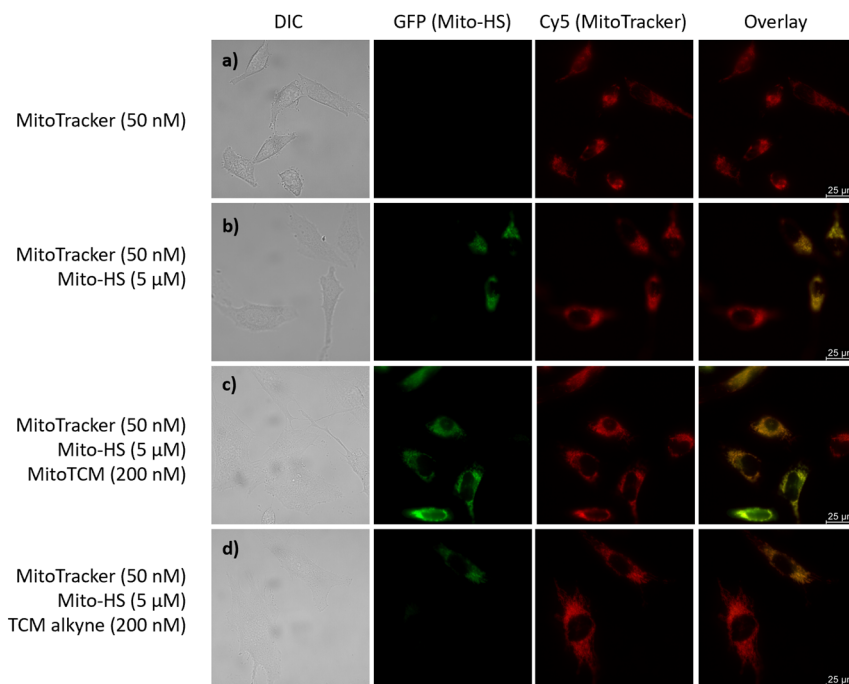

**Figure S2.** Fluorescence imaging of H<sub>2</sub>S produced by **MitoTCM** compared to **TCM alkyne** in HeLa cells. Cells were incubated with MitoTracker (50 nM) and (a) vehicle (0.5% DMSO), (b) Mito-HS (5  $\mu$ M), (c) Mito-HS (5  $\mu$ M) and **MitoTCM** (200 nM), (d) Mito-HS (5  $\mu$ M) and **TCM alkyne** (200 nM). Cells were incubated with MitoTracker and vehicle or Mito-HS for 30 minutes, and then either the vehicle, **MitoTCM** or **TCM alkyne** for 60 min followed by imaging. Bar scale: 25  $\mu$ m.

### 3. Fluorescence imaging of **LysoTCM** compared to **TCM alkyne**

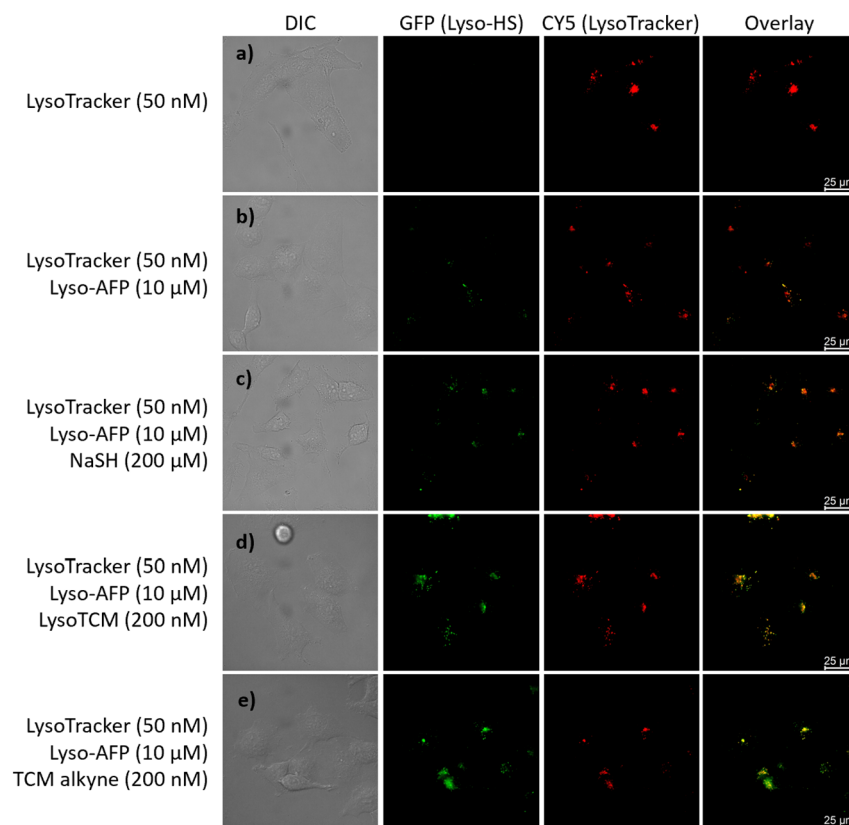

**Figure S3.** Fluorescence imaging of H<sub>2</sub>S produced by **LysoTCM** compared to **TCM alkyne** in HeLa cells. Cells were incubated with LysoTracker (50 nM) and (a) vehicle (0.5% DMSO), (b) Lyso-AFP (10  $\mu$ M), (c) Lyso-AFP (10  $\mu$ M) and NaSH (200  $\mu$ M, positive control), (d) Lyso-AFP (10  $\mu$ M) and **LysoTCM**, (e) Lyso-AFP (10  $\mu$ M) and **TCM alkyne** (200 nM). Cells were incubated with LysoTracker and vehicle or Lyso-AFP for 30 minutes, and then either the vehicle, NaSH, **LysoTCM**, or **TCM alkyne** for 60 min followed by imaging. Bar scale: 25  $\mu$ m.

#### 4. Fluorescence imaging of **ERTCM** compared to **TCM alkyne**

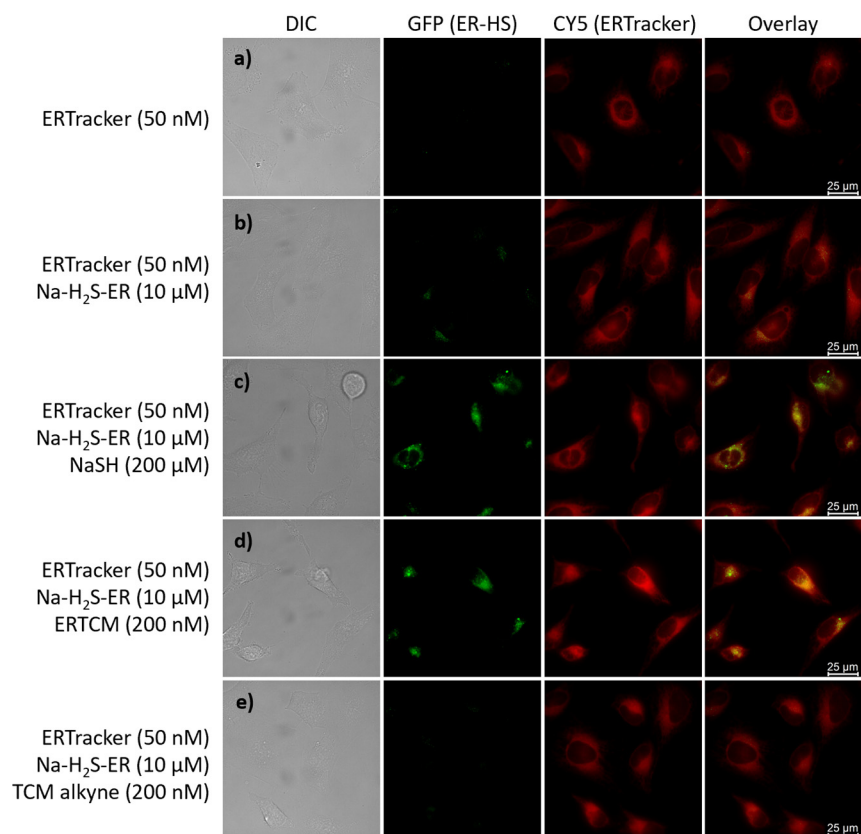

**Figure S4.** Fluorescence imaging of H<sub>2</sub>S produced by **ERTCM** compared to **TCM alkyne** in HeLa cells. Cells were incubated with ERTracker (50 nM) and (a) vehicle (0.5% DMSO), (b) Na-H<sub>2</sub>S-ER (10 μM), (c) Na-H<sub>2</sub>S-ER (10 μM) and NaSH (200 μM, positive control), (d) Na-H<sub>2</sub>S-ER (10 μM) and **ERTCM**, (e) Na-H<sub>2</sub>S-ER (10 μM) and **TCM alkyne** (200 nM). Cells were incubated with ERTracker and vehicle or Na-H<sub>2</sub>S-ER for 30 minutes, and then either the vehicle, NaSH, **ERTCM**, or **TCM alkyne** for 60 min followed by imaging. Bar scale: 25 μm.

## 5. Fluorescence imaging of **GolgiTCM** compared to **TCM alkyne**

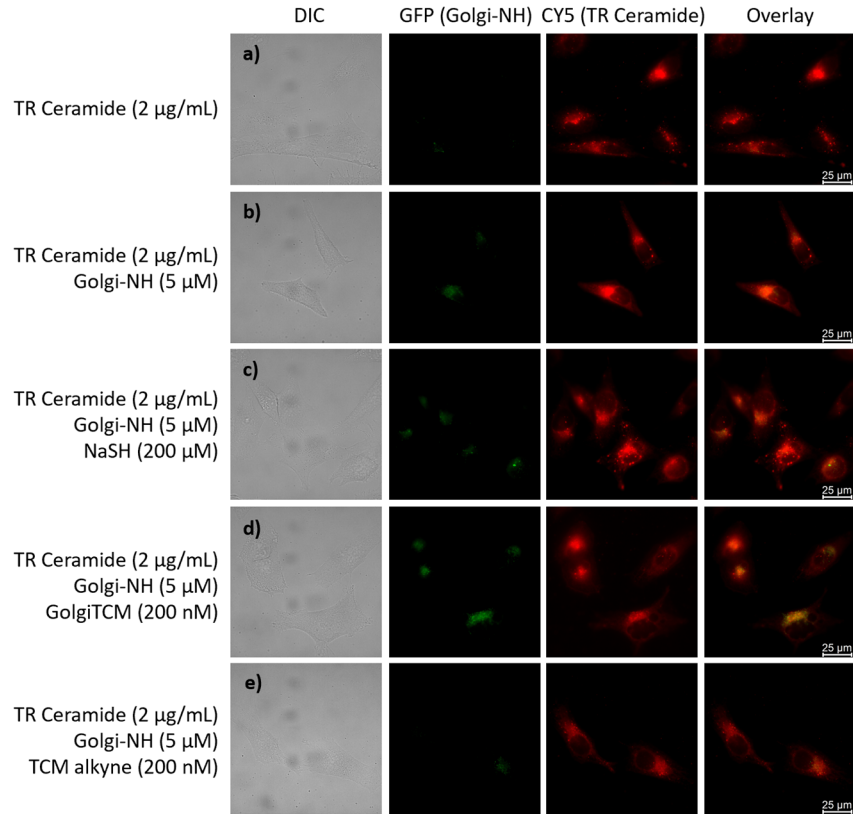

**Figure S5.** Fluorescence imaging of  $\text{H}_2\text{S}$  produced by **GolgiTCM** compared to **TCM alkyne** in HeLa cells. Cells were incubated with BODIPY<sup>TM</sup> TR Ceramide (2  $\mu\text{g}/\text{mL}$ ) and (a) vehicle (0.5% DMSO), (b) Golgi-NH (5  $\mu\text{M}$ ), (c) Golgi-NH (5  $\mu\text{M}$ ) and NaSH (200  $\mu\text{M}$ , positive control), (d) Golgi-NH (5  $\mu\text{M}$ ) and **GolgiTCM**, (e) Golgi-NH (5  $\mu\text{M}$ ) and **TCM alkyne** (200 nM). Cells were incubated with BODIPY<sup>TM</sup> TR Ceramide and vehicle or Golgi-NH for 30 minutes, and then either the vehicle, NaSH, **GolgiTCM**, or **TCM alkyne** for 60 min followed by imaging. Bar scale: 25  $\mu\text{m}$ .

## 6. Selectivity experiment of localized delivery

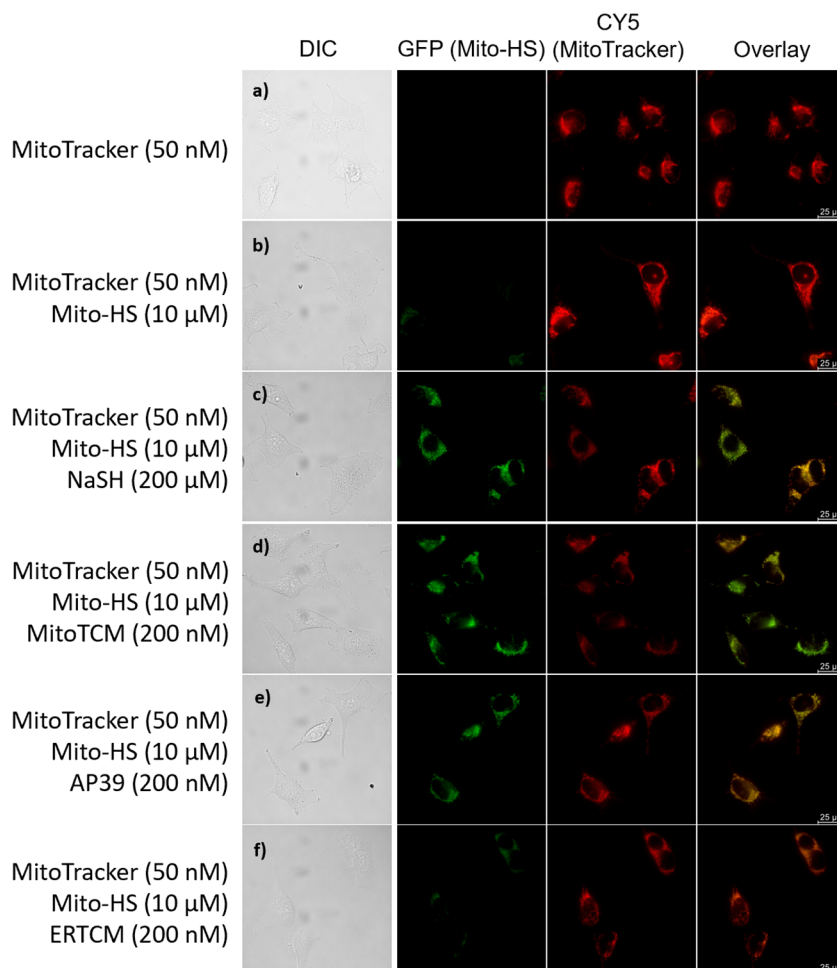

**Figure S6.** Fluorescence imaging of H<sub>2</sub>S produced by **MitoTCM**, AP39, and **ERTCM** in the presence of Mito-HS in HeLa cells. Cells were incubated with MitoTracker (50 nM) and (a) vehicle (0.5% DMSO), (b) Mito-HS (10 μM), (c) Mito-HS (10 μM) and NaSH (200 μM, positive control), (d) Mito-HS (10 μM) and **MitoTCM** (200 nM), (e) Mito-HS (10 μM) and AP39 (200 nM), (f) Mito-HS (10 μM) and **ERTCM** (200 nM). Cells were incubated with MitoTracker and vehicle or Mito-HS for 30 minutes, and then either the vehicle, **MitoTCM**, AP39, or **ERTCM** for 60 min followed by imaging. Bar scale: 25 μm.

## 7. Colocalization negative control experiment

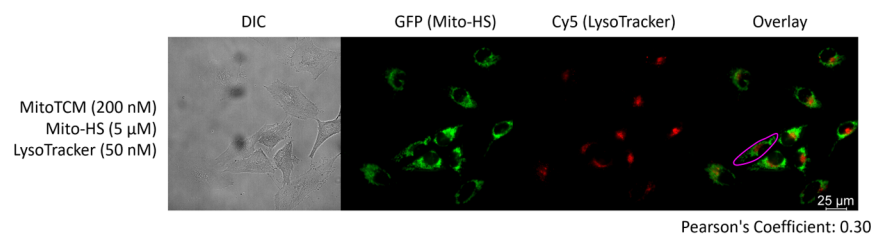

**Figure S7.** Fluorescence imaging of H<sub>2</sub>S produced by **MitoTCM** using Mito-HS in the presence of LysoTracker in HeLa cells. Cells were incubated with LysoTracker (50 nM) and Mito-HS (5 µM) for 30 minutes, then incubated with **MitoTCM** (200 nM) for 60 min followed by imaging. Pearson's coefficient = 0.30 suggesting minimal colocalization of H<sub>2</sub>S produced by MitoTCM and imaged with Mito-HS with LysoTracker. Bar scale: 25 µm.



## 8. Monensin Cell Viability Experiment

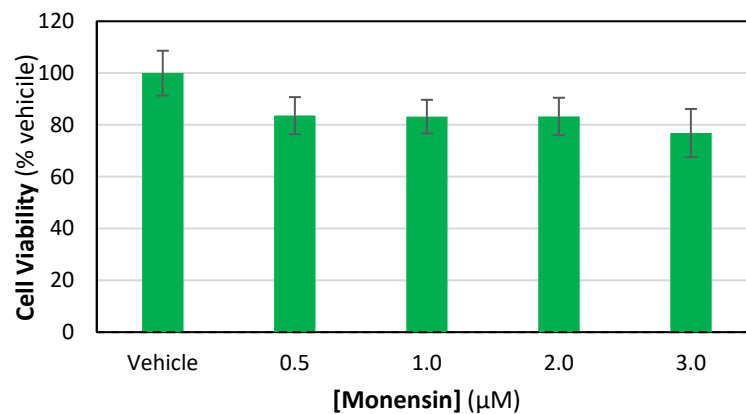

**Figure S8.** Cell viability of H9C2 cells in the presence of Monensin. H9C2 cells were treated with either DMSO (0.5%, vehicle) or Monensin (0.5, 1.0, 2.0, or 3 μM) for 19 h. Cell viability was assessed using a CCK-8 kit. Results are expressed as mean ± SD ( $n = 12$ ).

## 9. NMR Spectra

$^1\text{H}$  NMR (600 MHz,  $\text{CDCl}_3$ ) and  $^{13}\text{C}\{^1\text{H}\}$  NMR (151 MHz,  $\text{CDCl}_3$ ) spectra of 1-ethynyl-4-isothiocyanatobenzene.

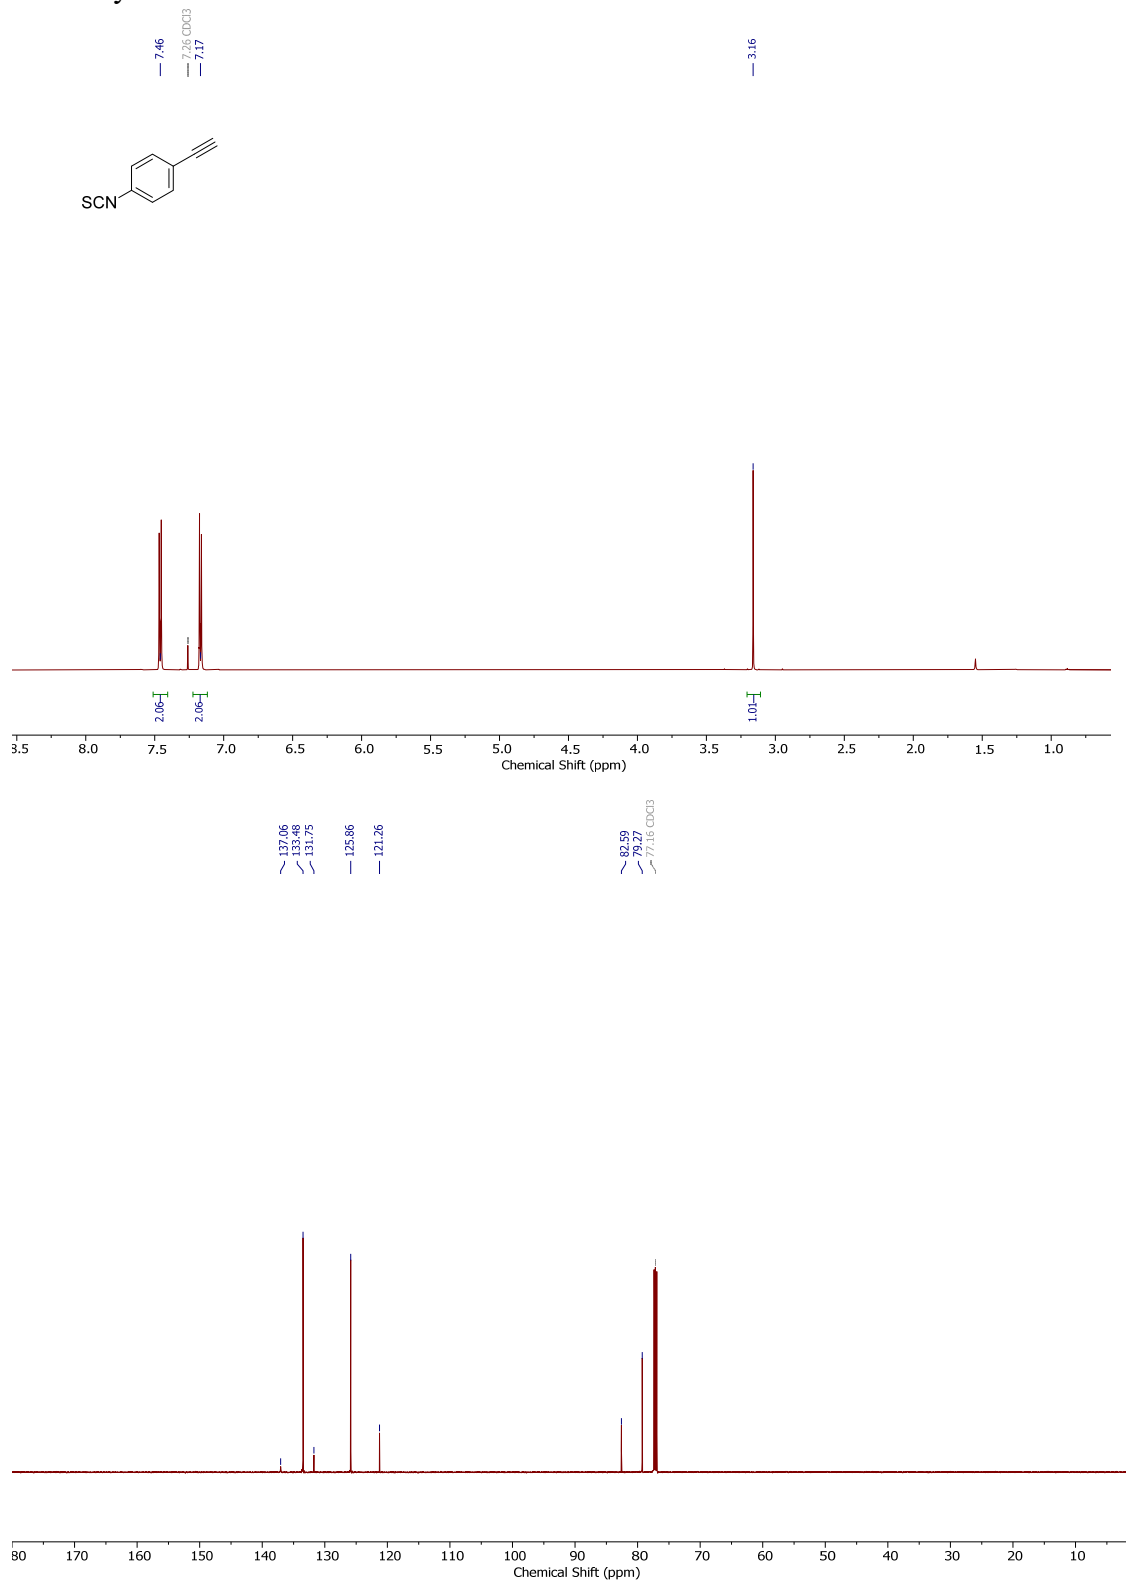

$^1\text{H}$  NMR (500 MHz,  $\text{DMSO-}d_6$ , 60 °C) and  $^{13}\text{C}\{^1\text{H}\}$  NMR (126 MHz,  $\text{DMSO-}d_6$ , 60 °C) spectra of TCM alkyne

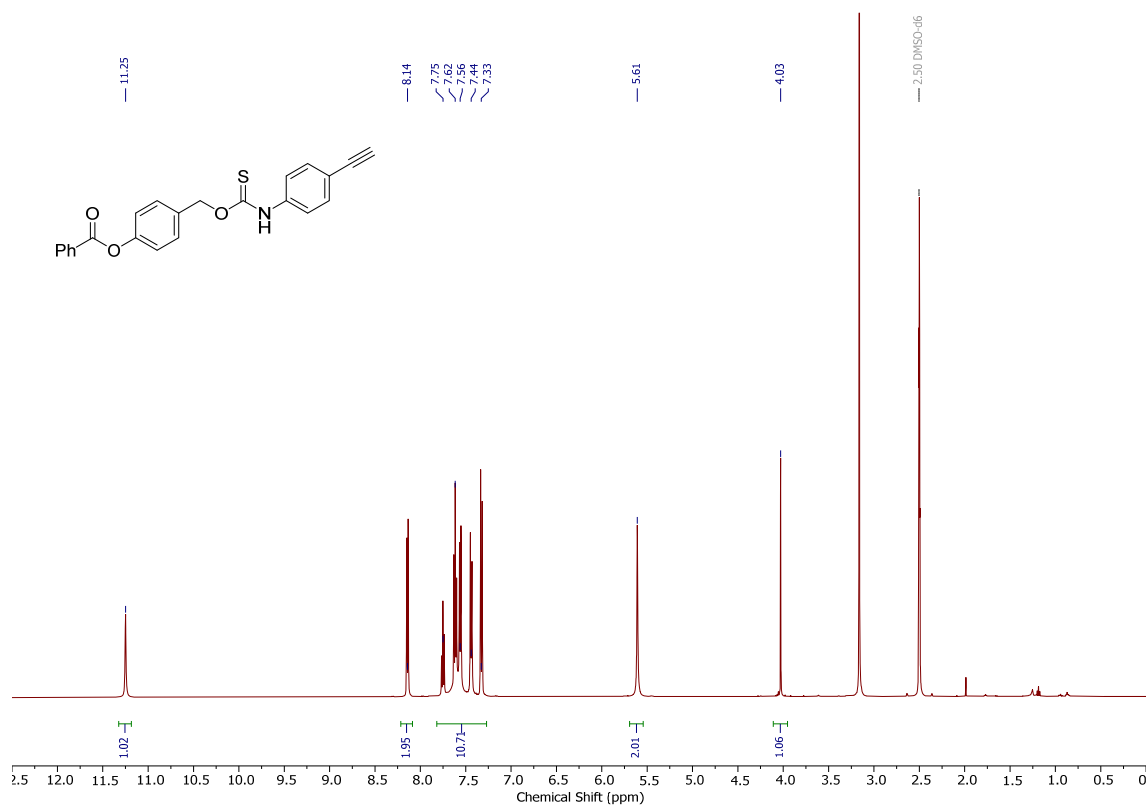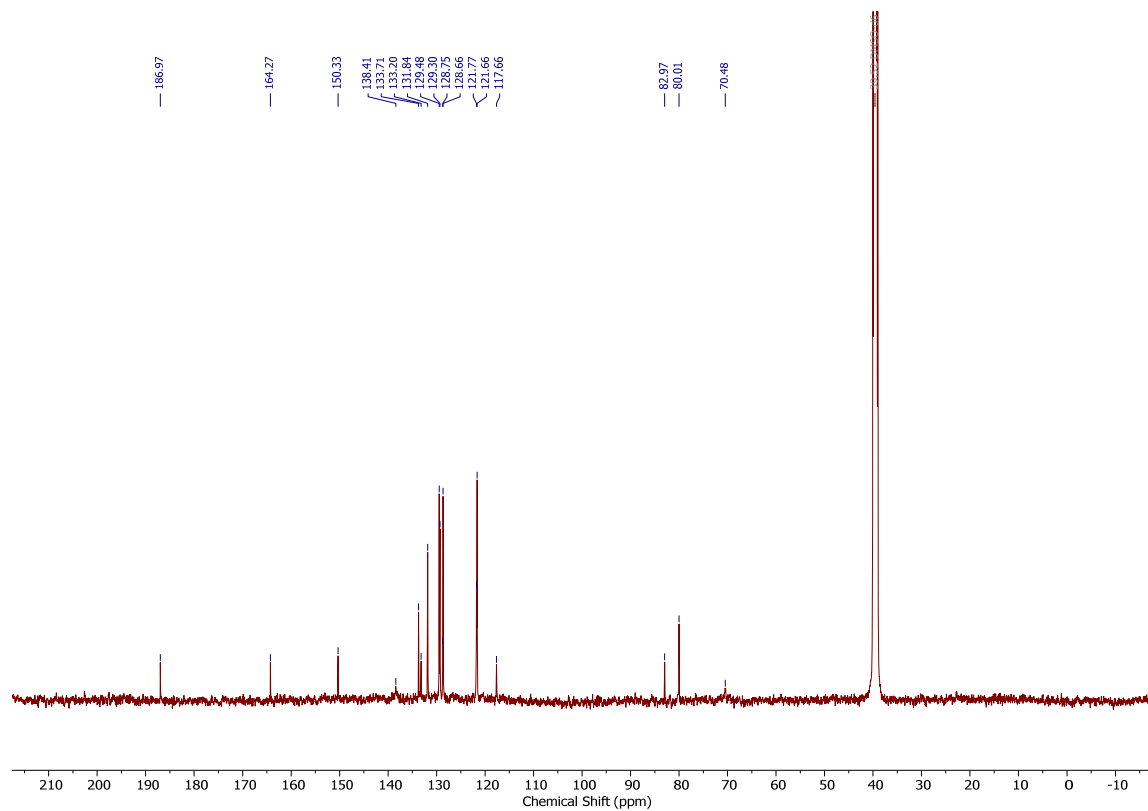

$^1\text{H}$  NMR (500 MHz,  $\text{DMSO-}d_6$ ) and  $^{13}\text{C}\{^1\text{H}\}$  NMR (126 MHz,  $\text{DMSO-}d_6$ ) spectra of (6-bromohexyl)triphenylphosphonium bromide.

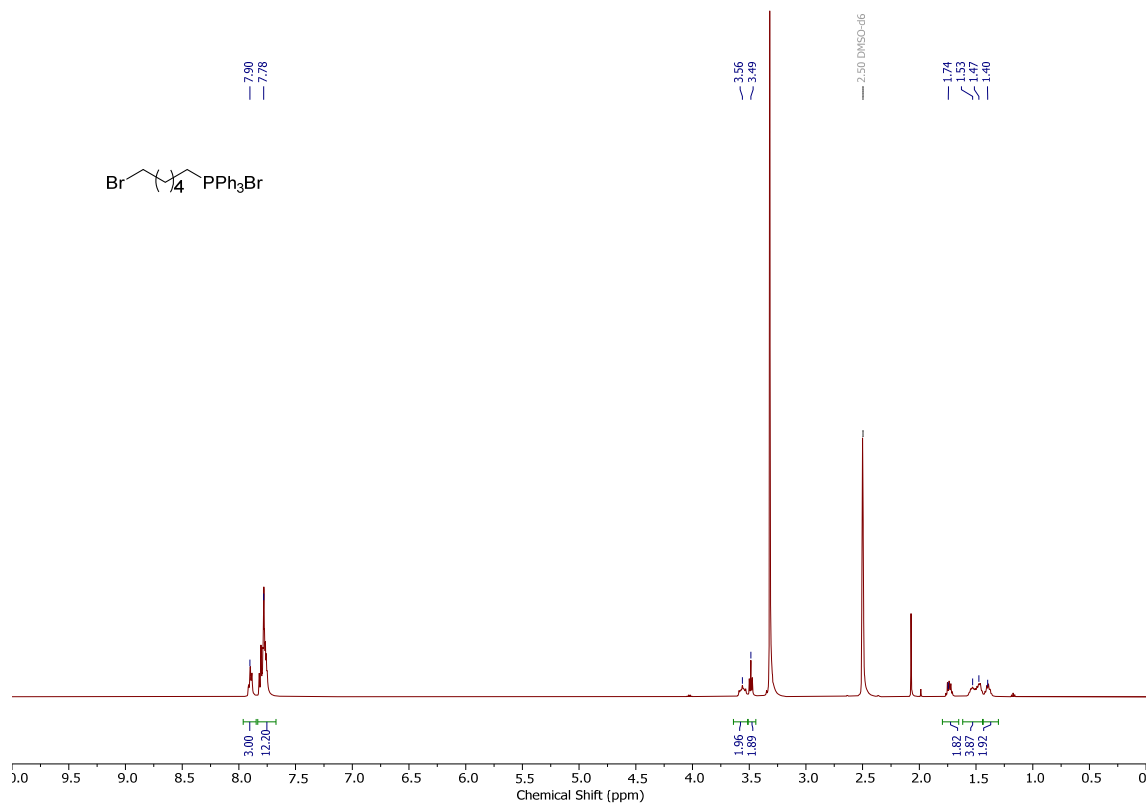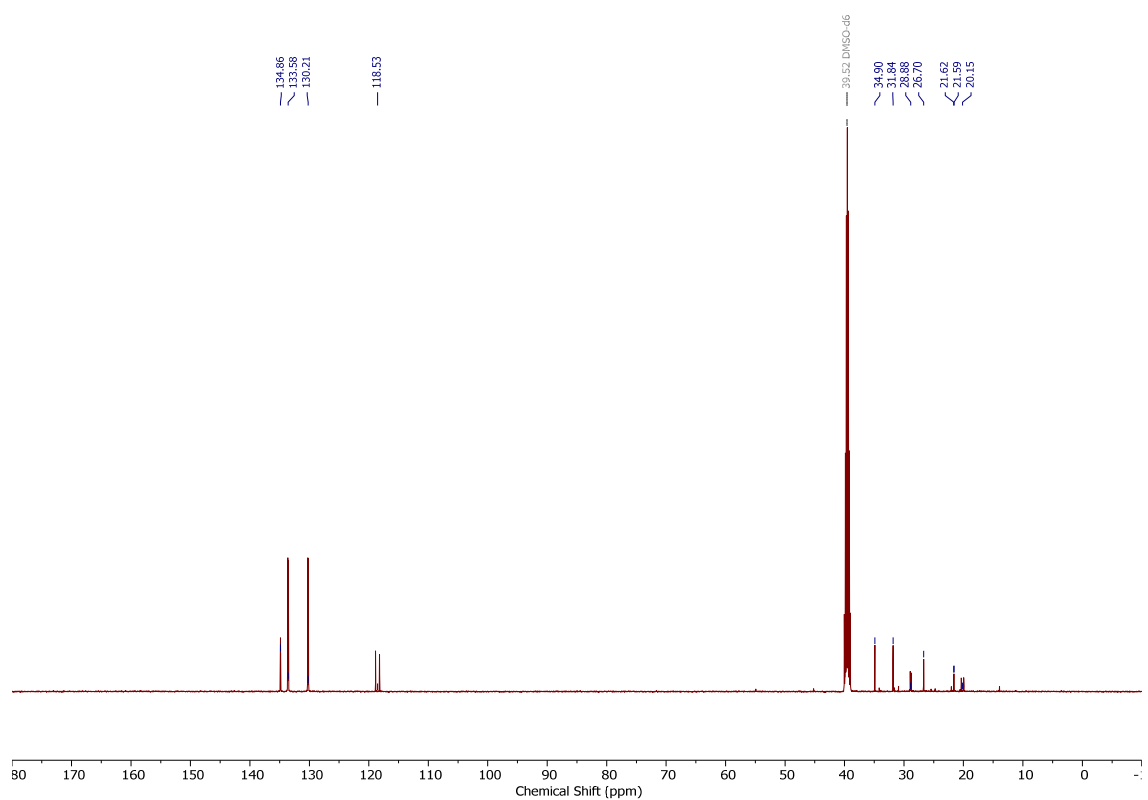

$^{31}\text{P}\{^1\text{H}\}$  NMR (202 MHz,  $\text{DMSO-}d_6$ ) spectrum of (6-bromohexyl)triphenylphosphonium bromide.

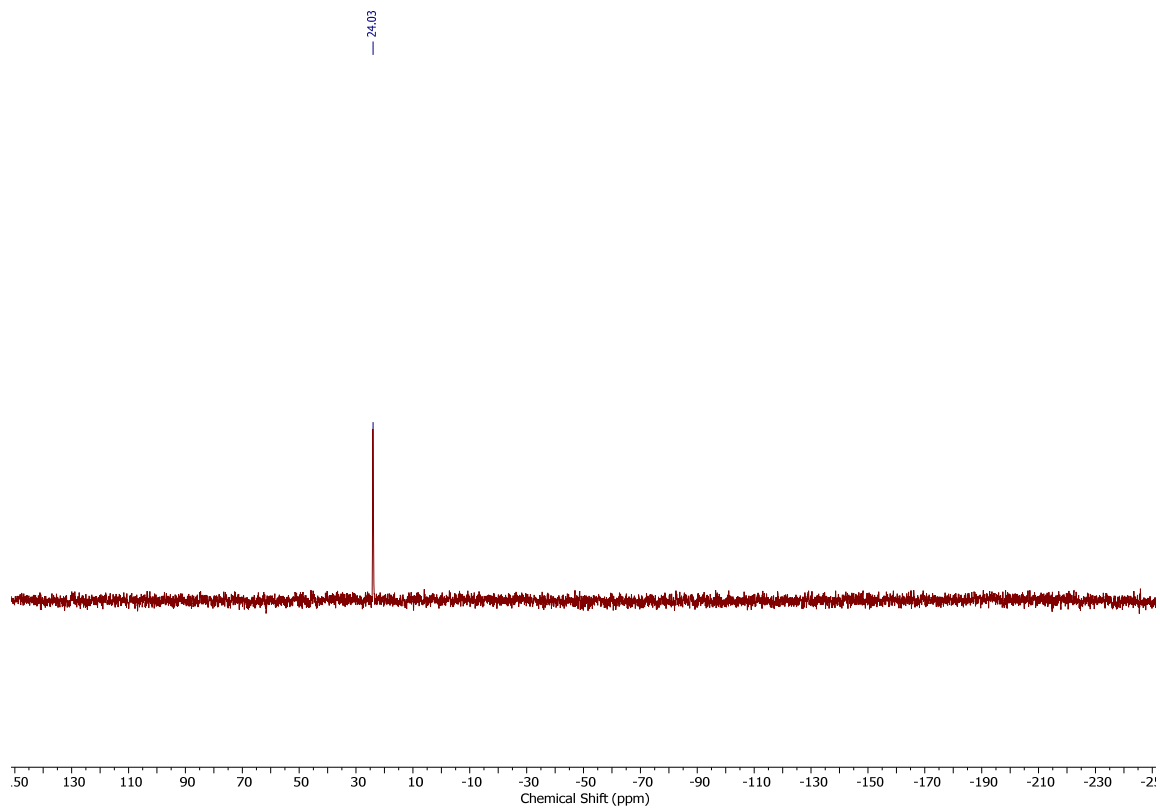

$^1\text{H}$  NMR (500 MHz,  $\text{DMSO-}d_6$ ) and  $^{13}\text{C}\{^1\text{H}\}$  NMR (151 MHz,  $\text{CDCl}_3$ ) spectra of (6-azidohexyl)triphenylphosphonium bromide.

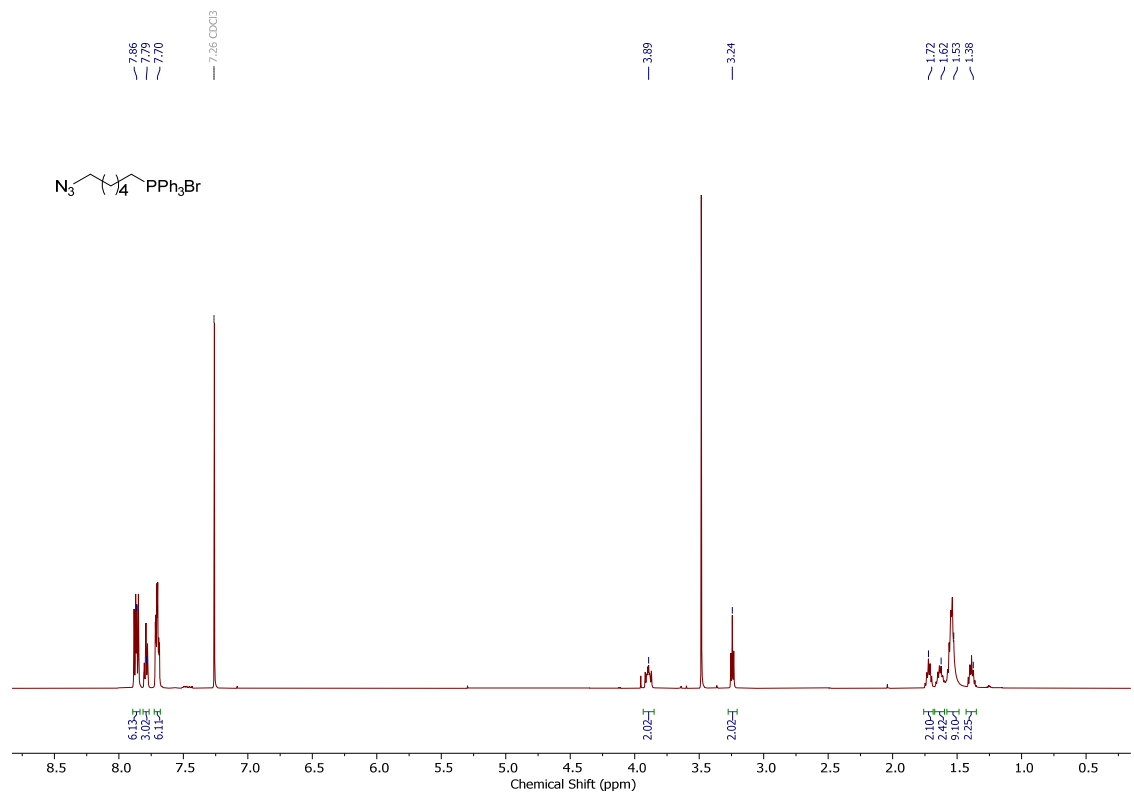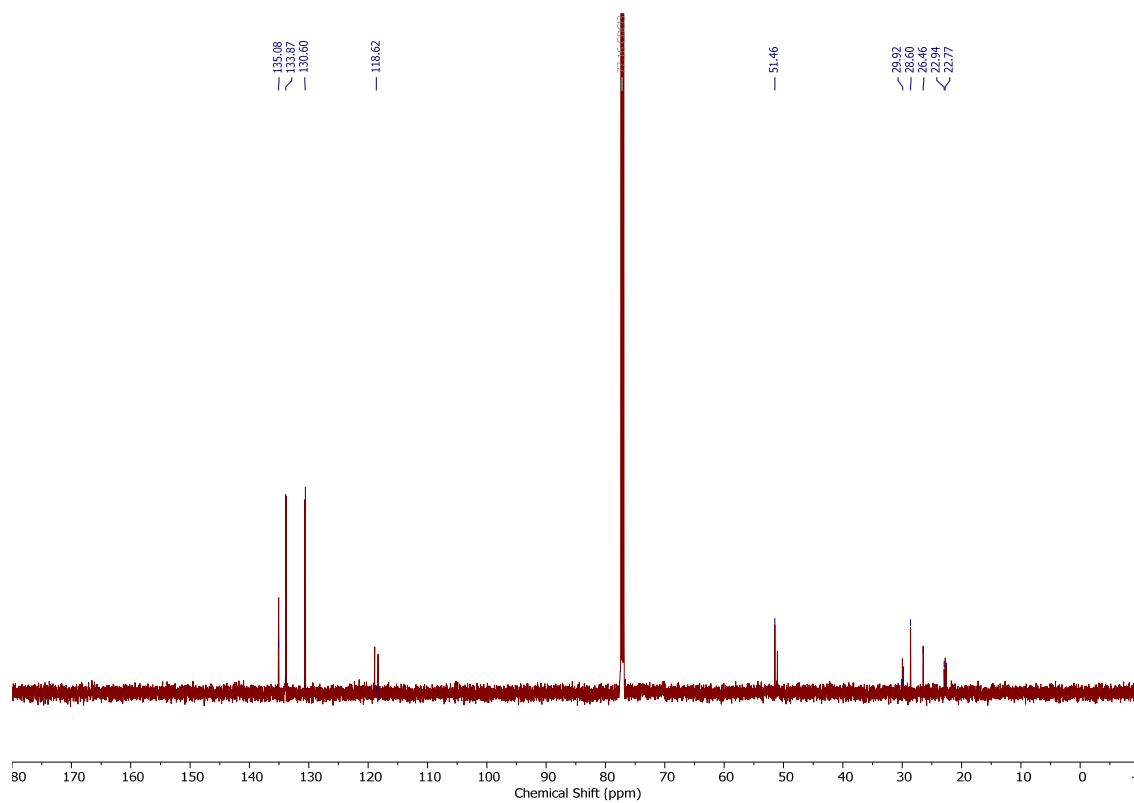

$^{31}\text{P}\{^1\text{H}\}$  NMR (202 MHz,  $\text{CDCl}_3$ ) spectrum of (6-azidoethyl)triphenylphosphonium bromide.

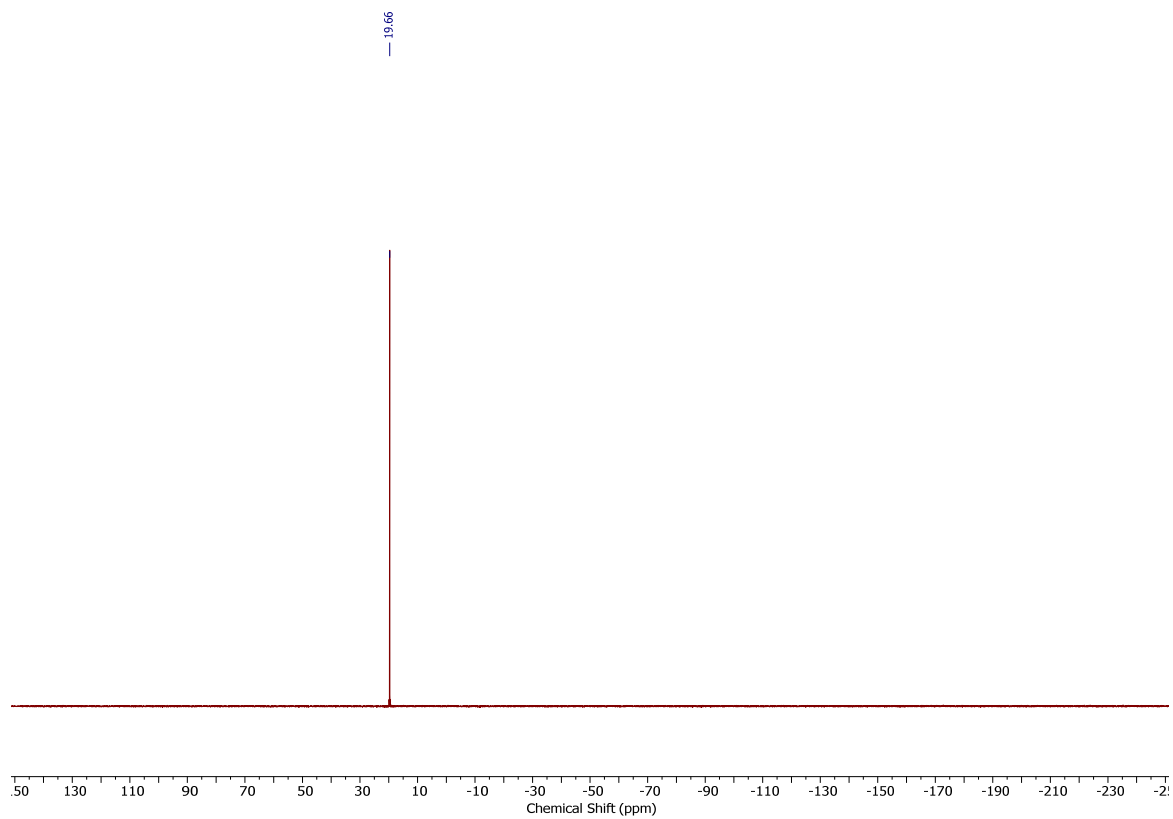

$^1\text{H}$  NMR (500 MHz,  $\text{CDCl}_3$ ) and  $^{13}\text{C}\{^1\text{H}\}$  NMR (126 MHz,  $\text{CDCl}_3$ ) spectra of 4-(2-azidoethyl)morpholine.

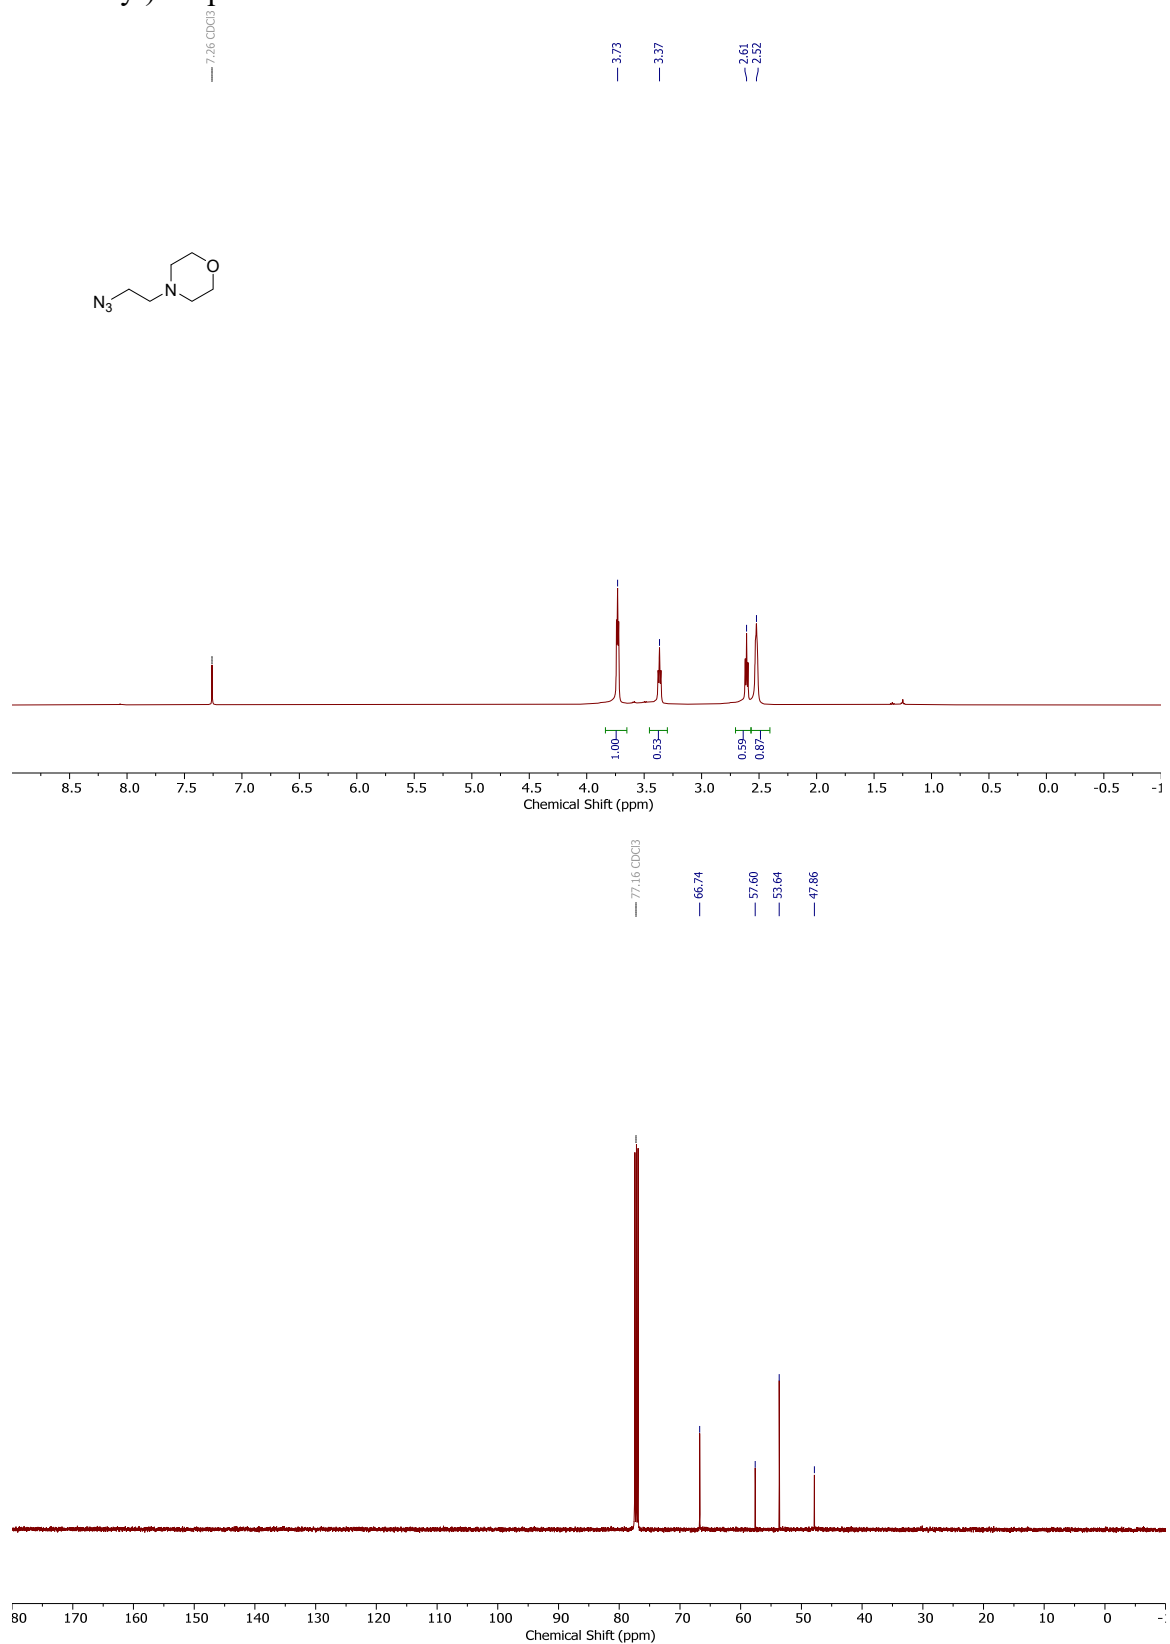



$^1\text{H}$  NMR (500 MHz,  $\text{CDCl}_3$ ) and  $^{13}\text{C}\{^1\text{H}\}$  NMR (126 MHz,  $\text{CDCl}_3$ ) spectra of *N*-(2-azidoethyl)-4-methylbenzenesulfonamide.

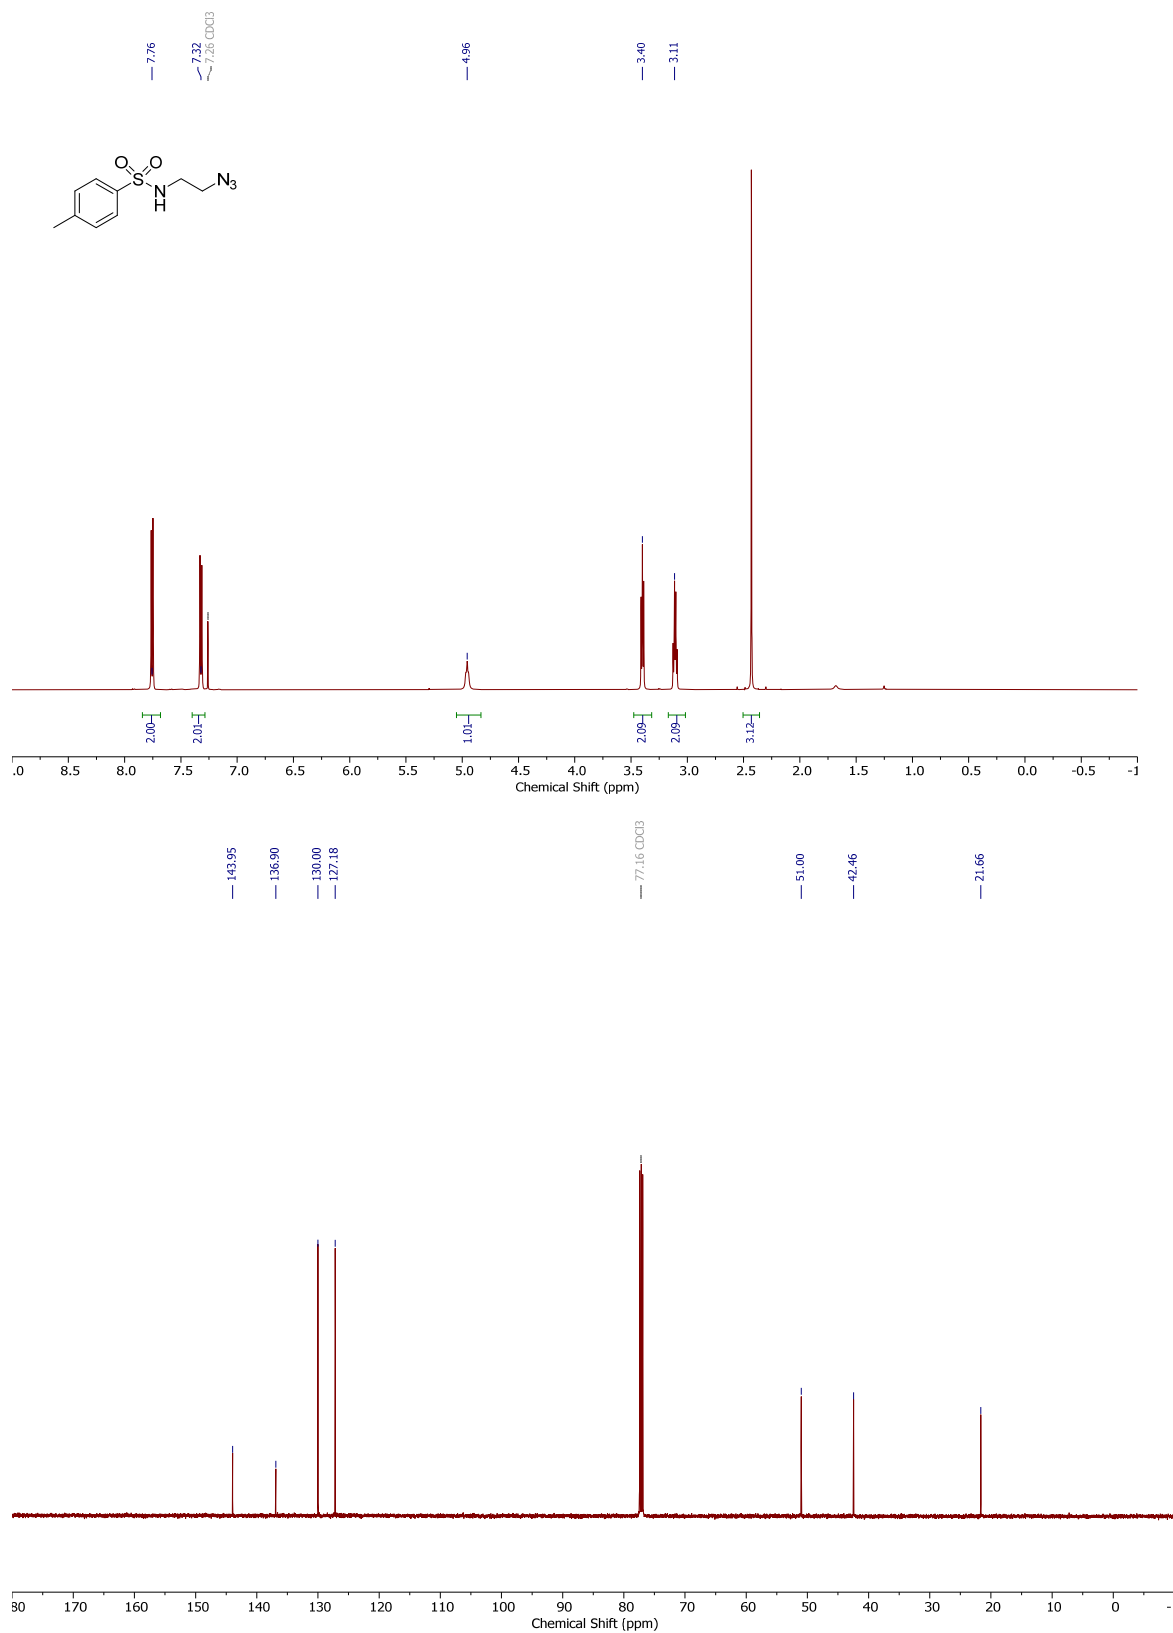

$^1\text{H}$  NMR (500 MHz,  $\text{CDCl}_3$ ) and  $^{13}\text{C}\{^1\text{H}\}$  NMR (126 MHz,  $\text{CDCl}_3$ ) spectra of 4-(2-azidoethyl)benzenesulfonamide.

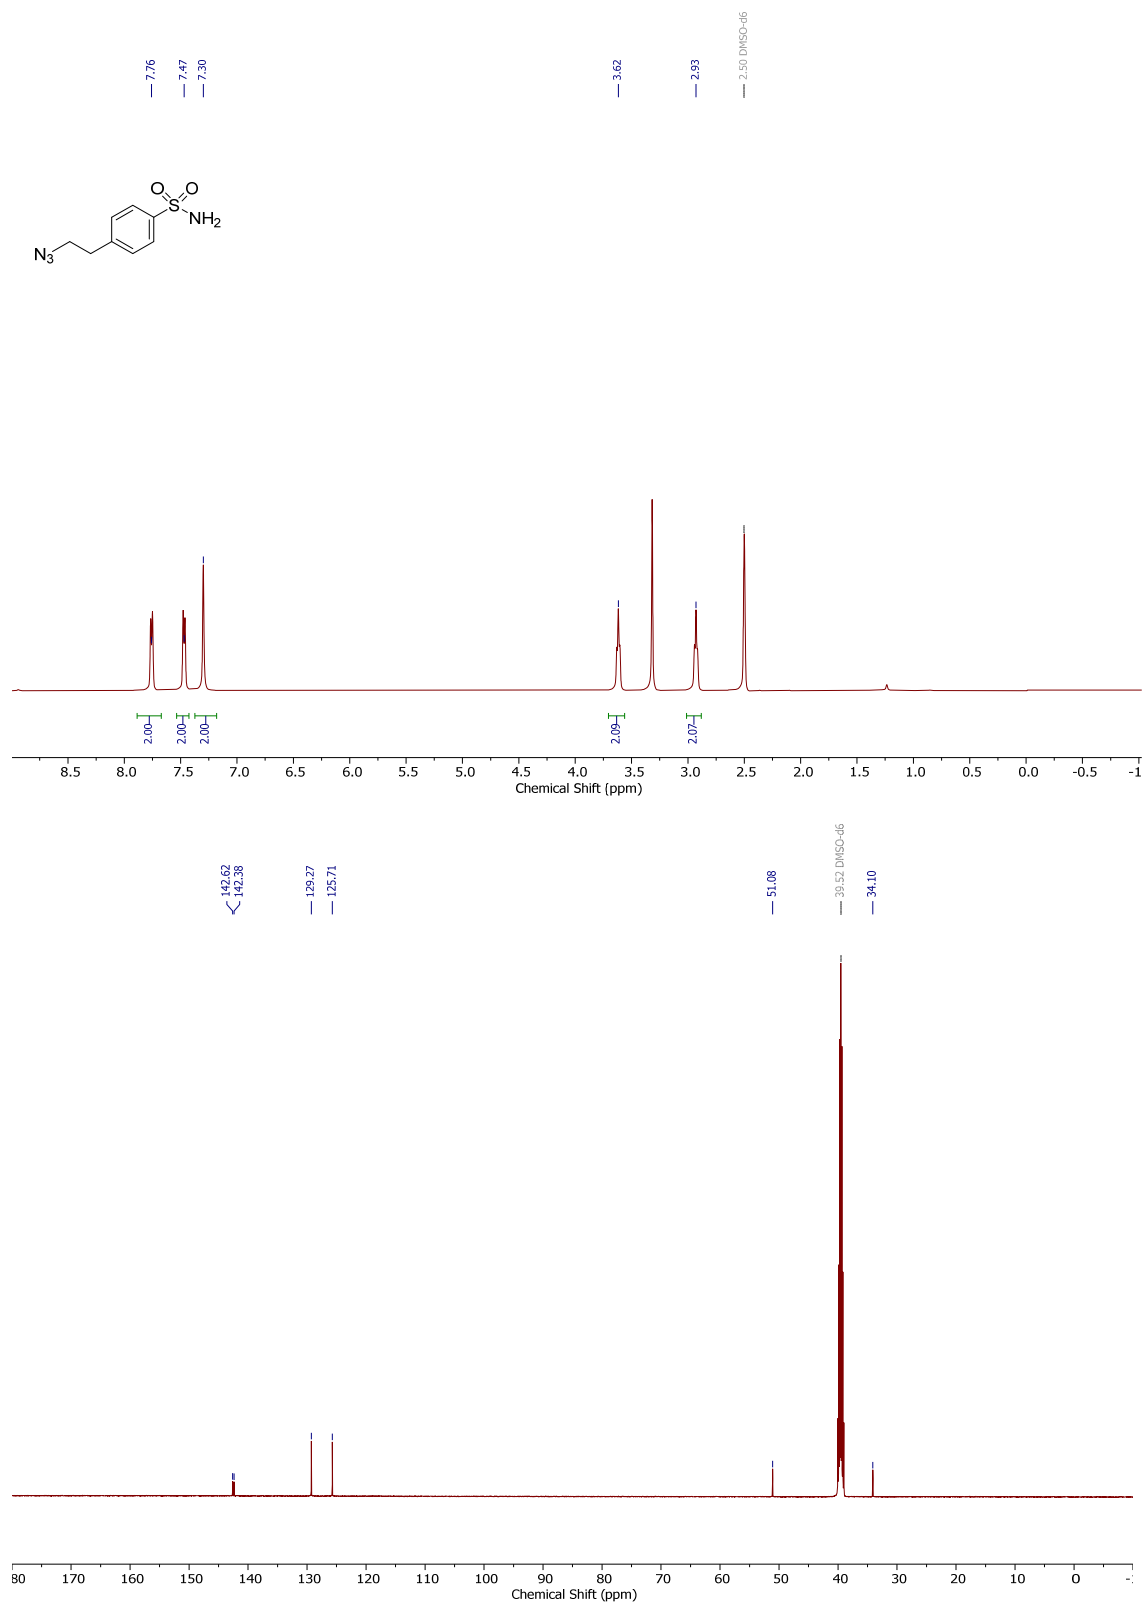



$^{31}\text{P}\{^1\text{H}\}$  NMR (202 MHz, DMSO- $d_6$ , 60 °C) spectrum of **MitoTCM**.

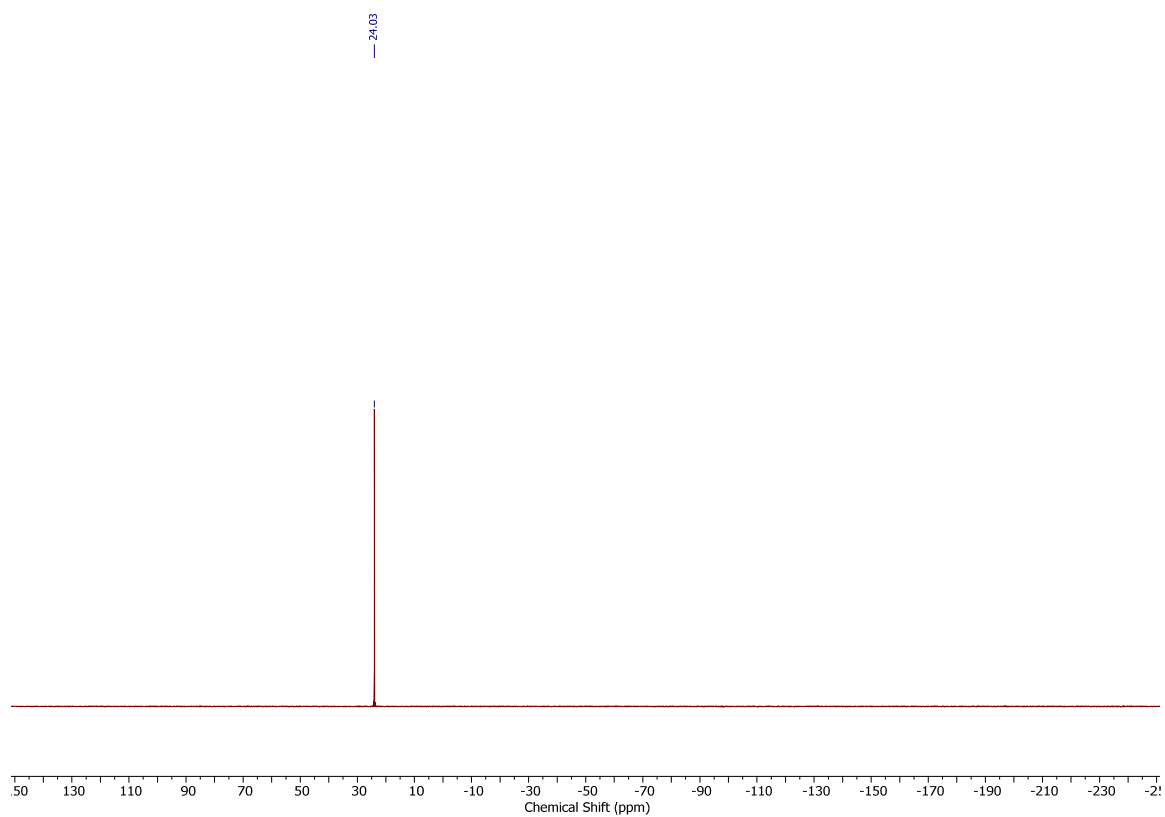

$^1\text{H}$  NMR (600 MHz,  $\text{DMSO-}d_6$ , 60 °C) and  $^{13}\text{C}\{^1\text{H}\}$  NMR (151 MHz,  $\text{DMSO-}d_6$ , 60 °C) spectra of LysoTCM.

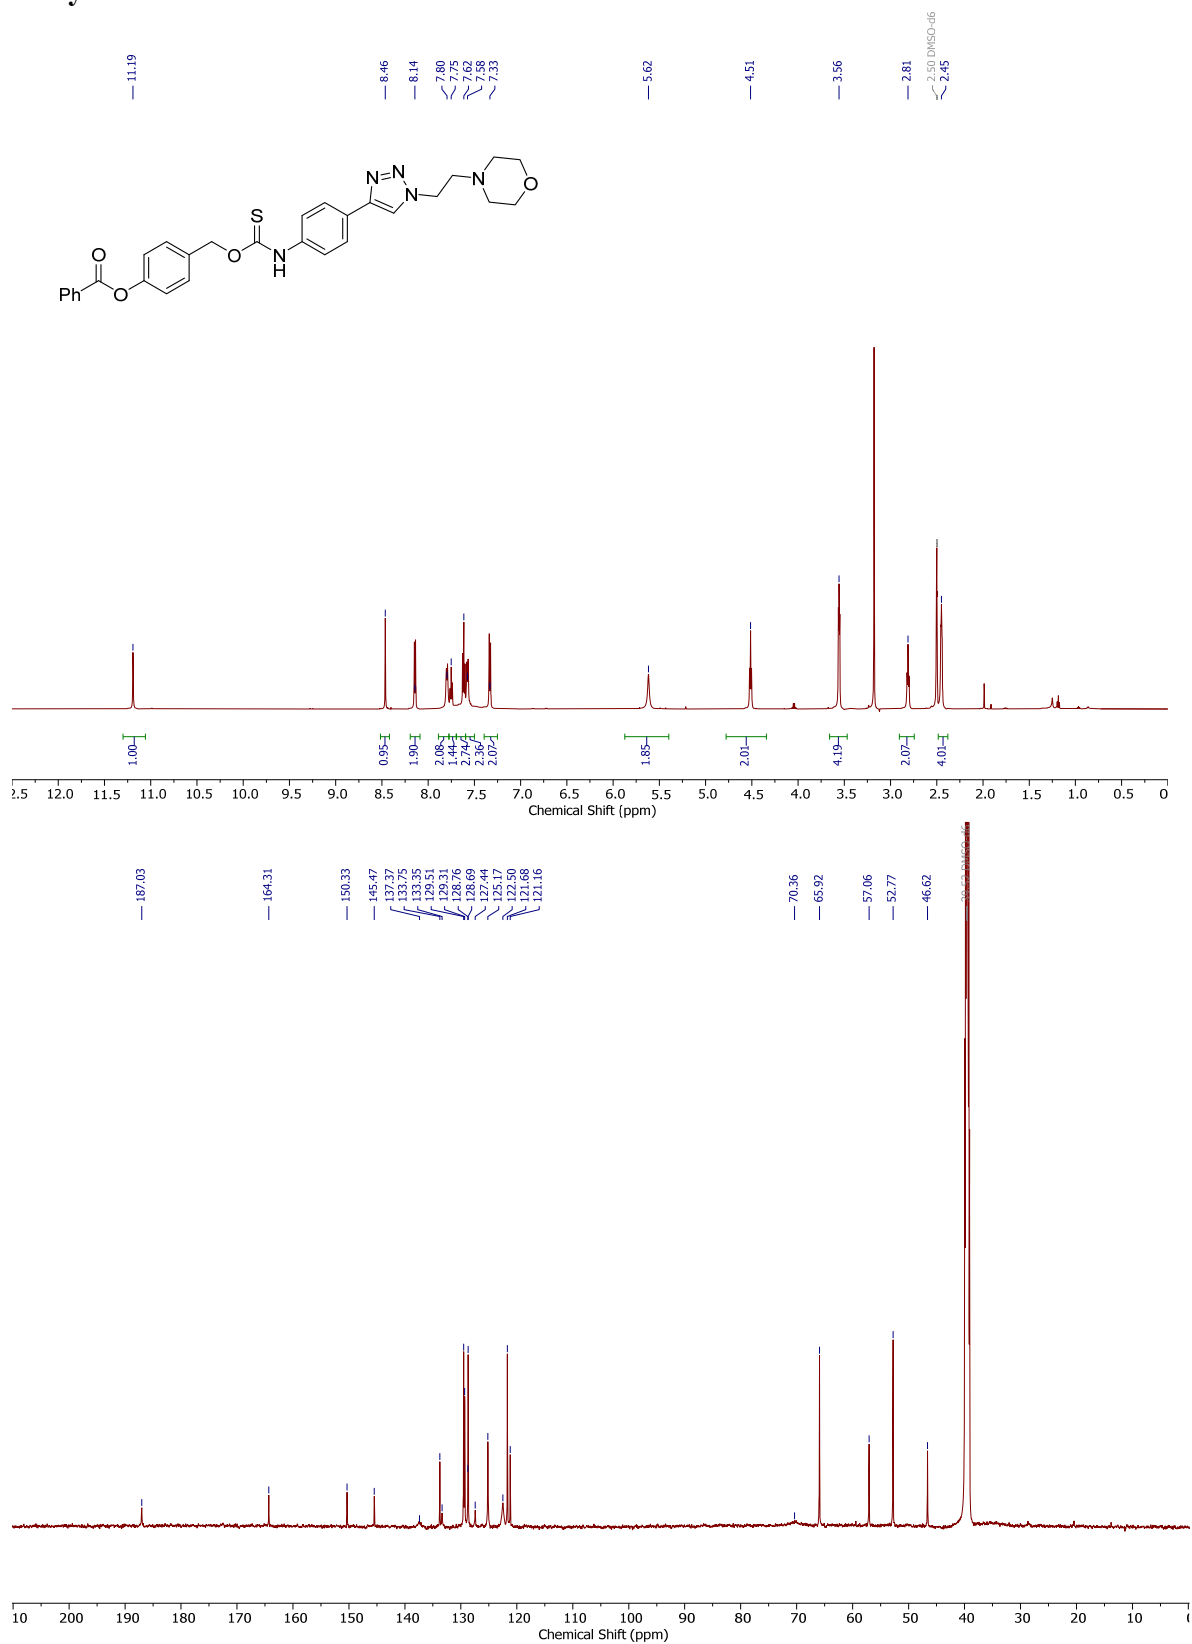

$^1\text{H}$  NMR (600 MHz,  $\text{DMSO-}d_6$ , 60 °C) and  $^{13}\text{C}\{^1\text{H}\}$  NMR (151 MHz,  $\text{DMSO-}d_6$ , 60 °C) spectra of **ERTCM**.

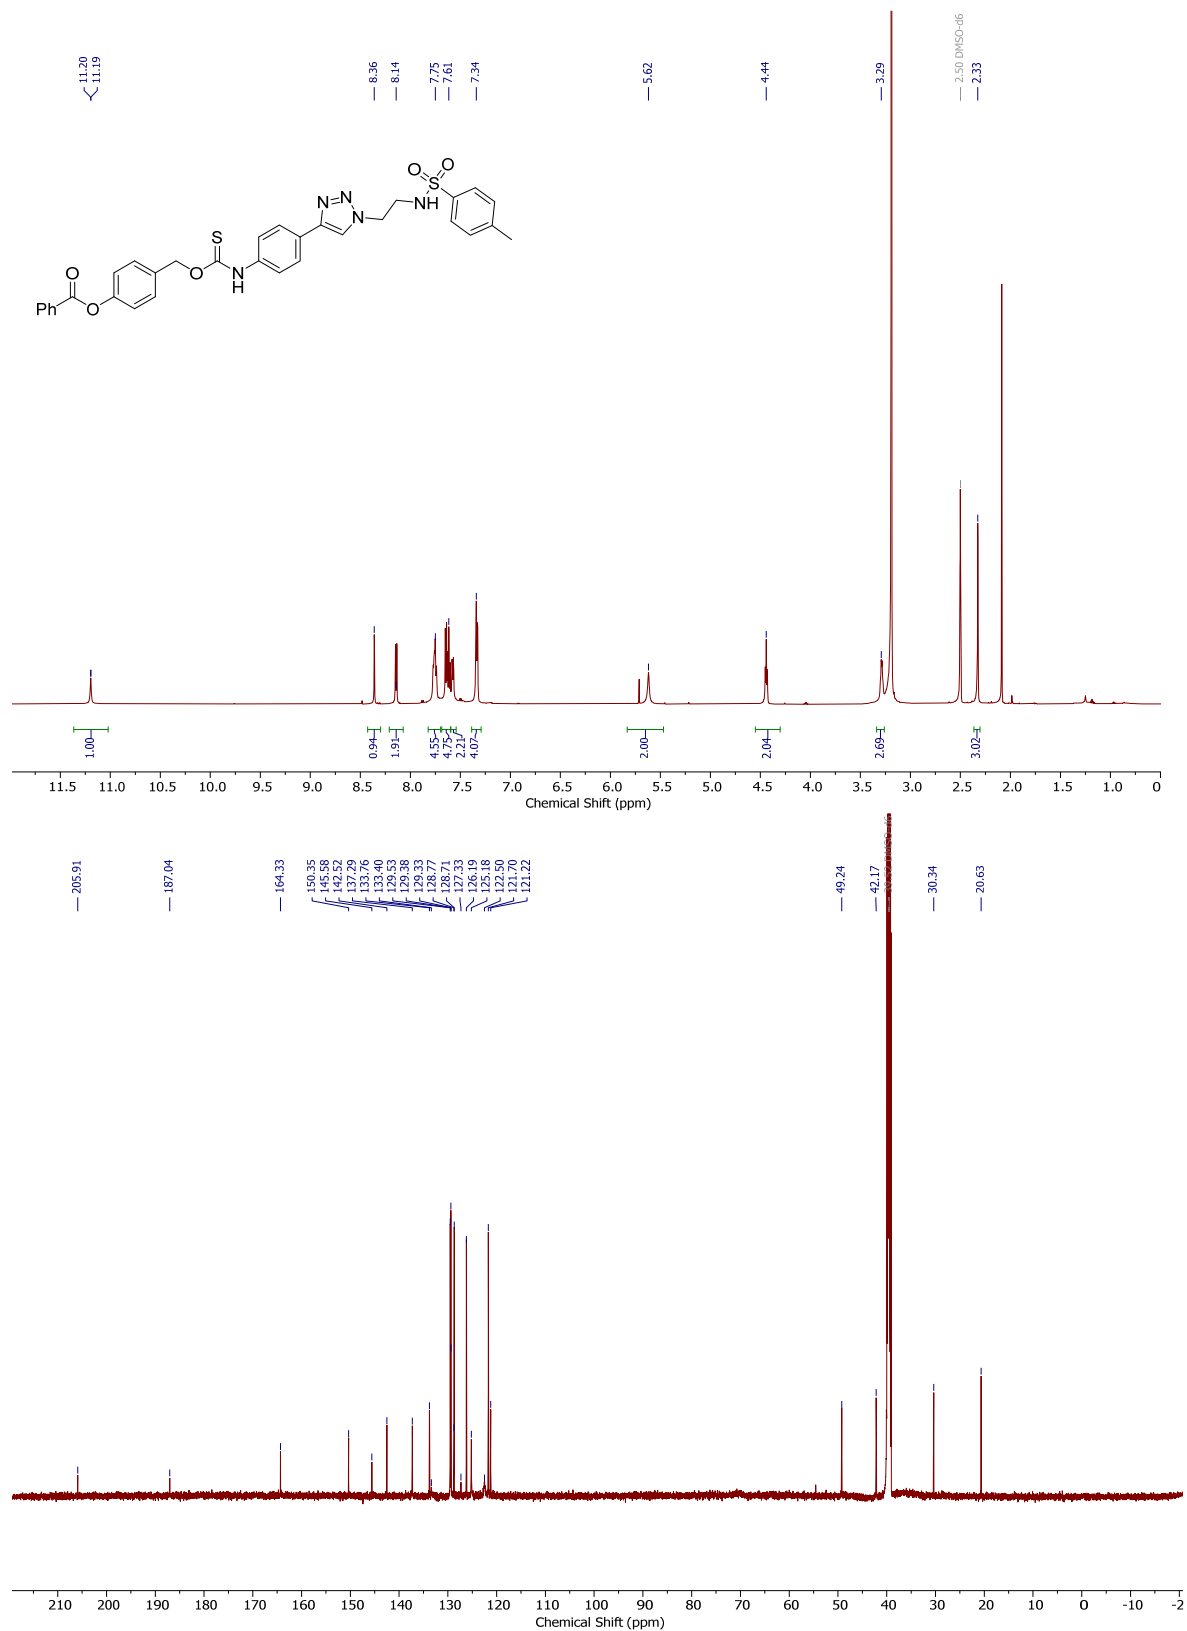

$^1\text{H}$  NMR (600 MHz,  $\text{DMSO-}d_6$ , 60 °C) and  $^{13}\text{C}\{^1\text{H}\}$  NMR (151 MHz,  $\text{DMSO-}d_6$ , 60 °C) spectra of **GolgiTCM**.

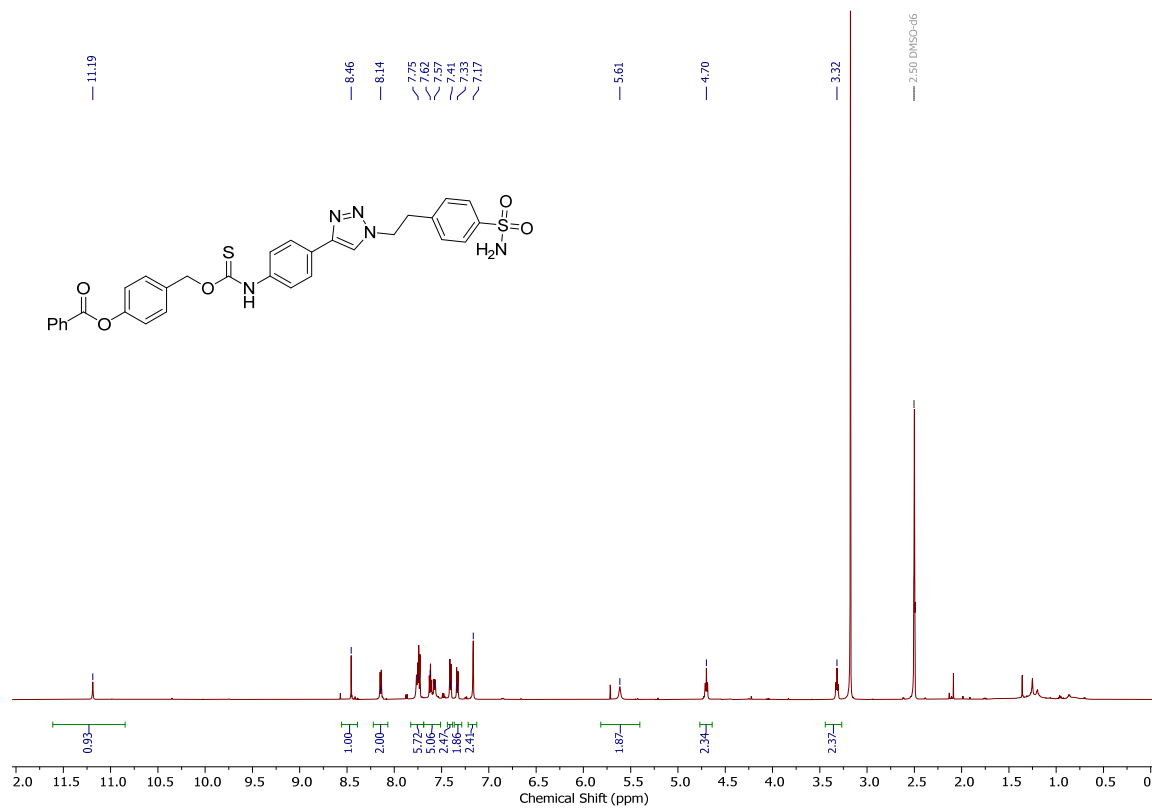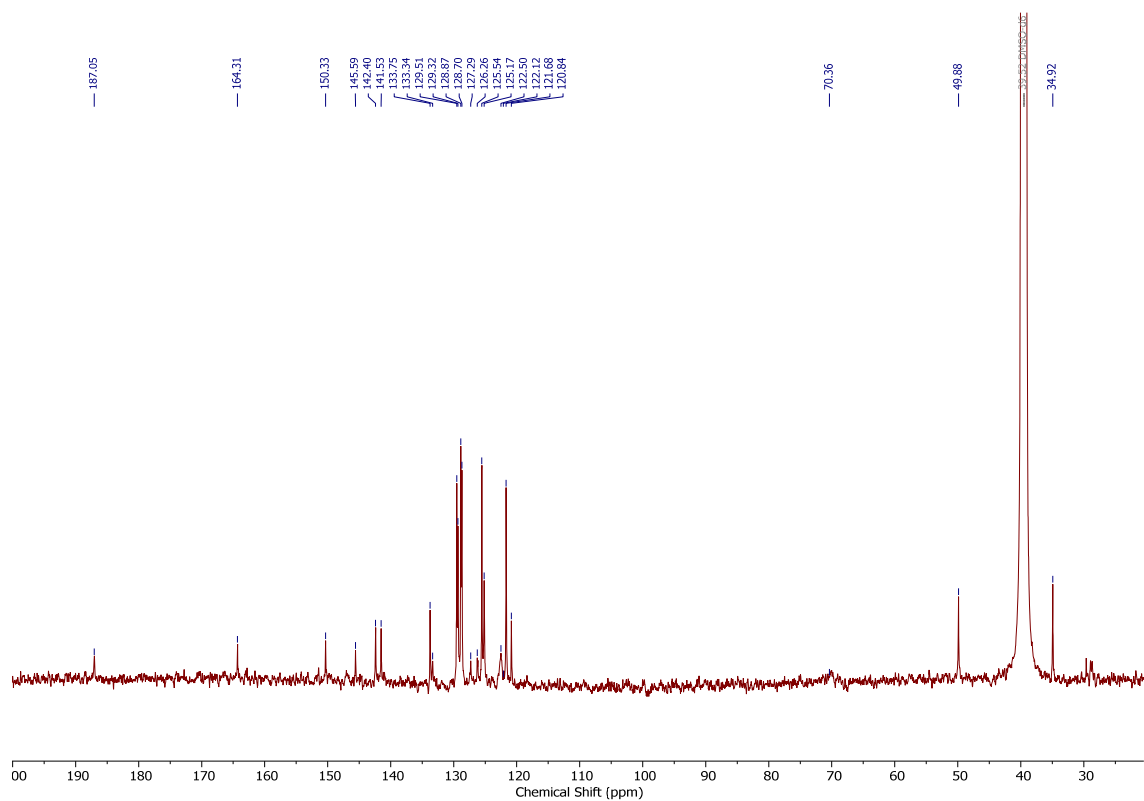

$^1\text{H}$  NMR (500 MHz,  $\text{CD}_3\text{OD}$ ) and  $^{31}\text{P}\{^1\text{H}\}$  NMR (202 MHz,  $\text{CD}_3\text{OD}$ ) spectra of Mito-HS.

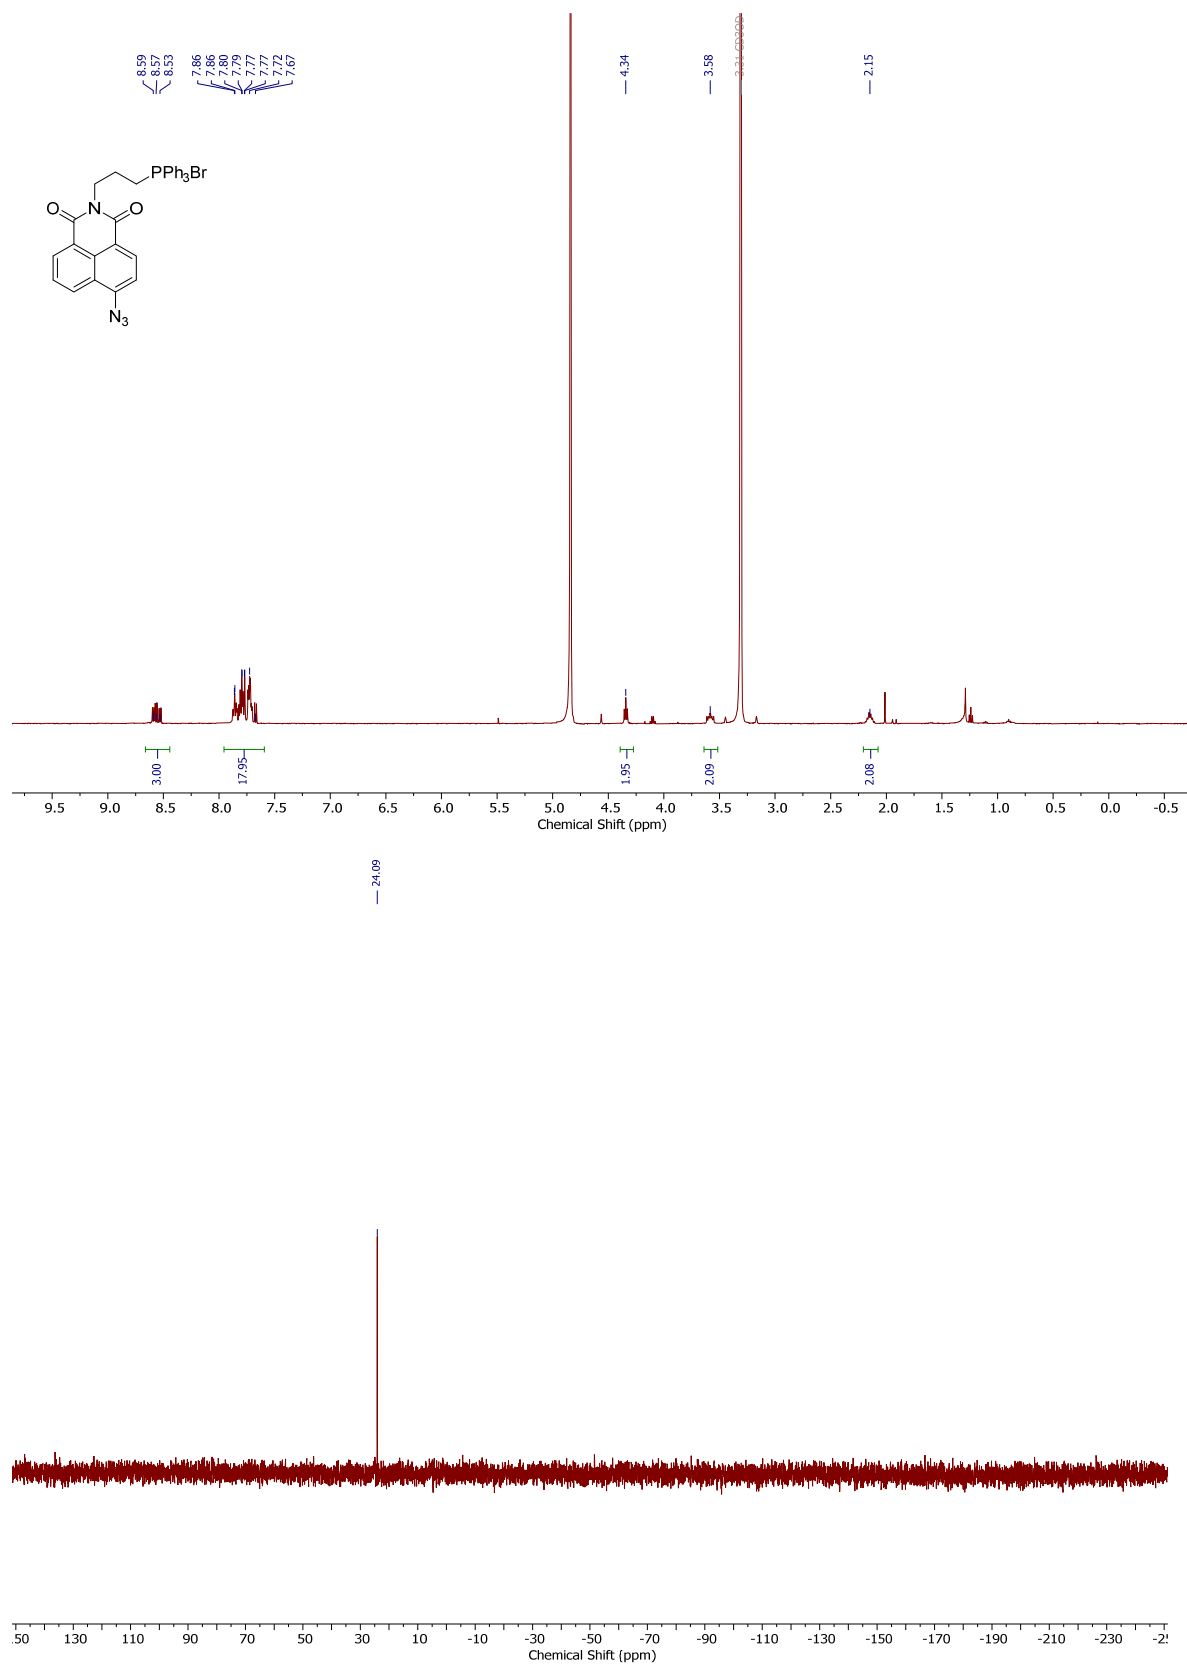



$^1\text{H}$  NMR (500 MHz,  $\text{CDCl}_3$ ) spectrum of Lyso-AFP.

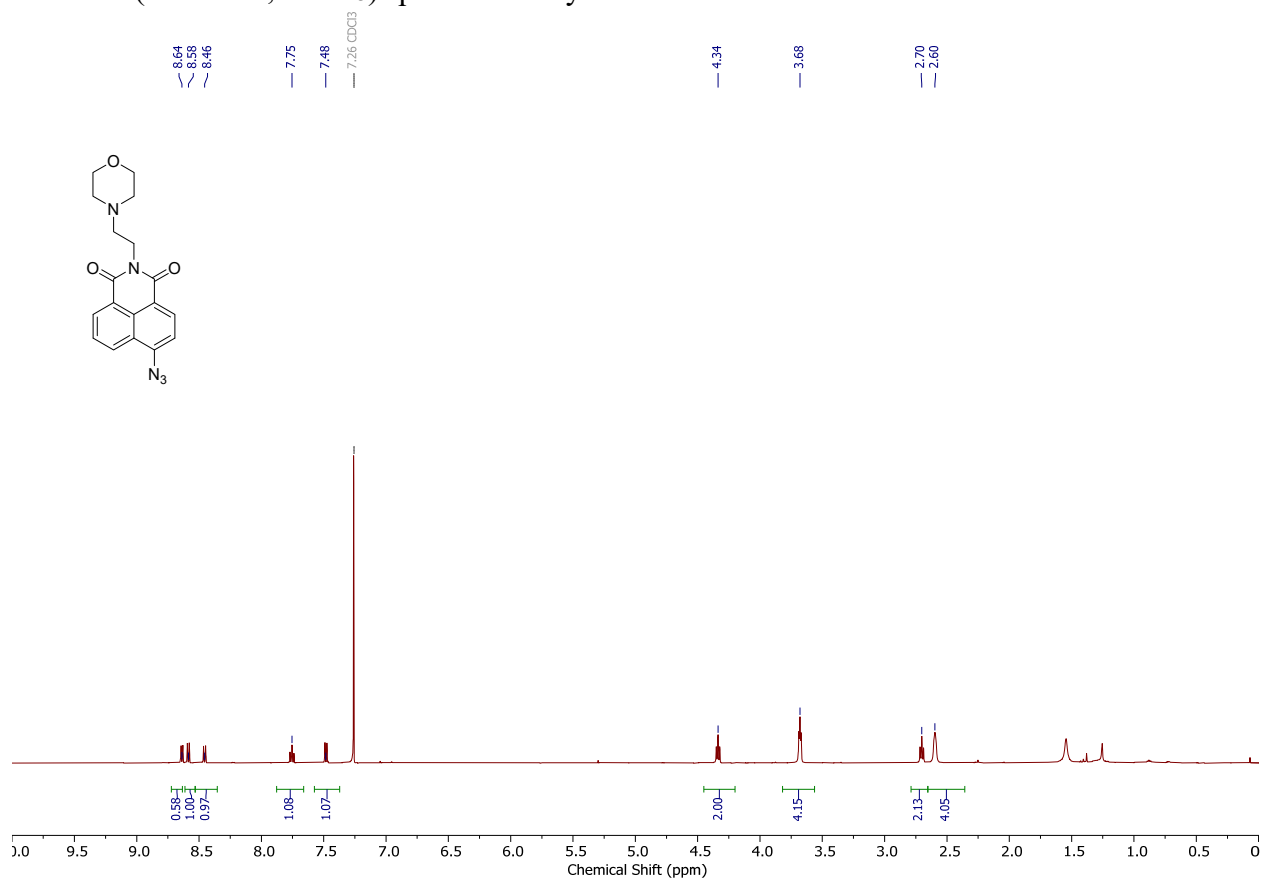

$^1\text{H}$  NMR (500 MHz,  $\text{DMSO-}d_6$ ) spectrum of Na- $\text{H}_2\text{S-ER}$ .

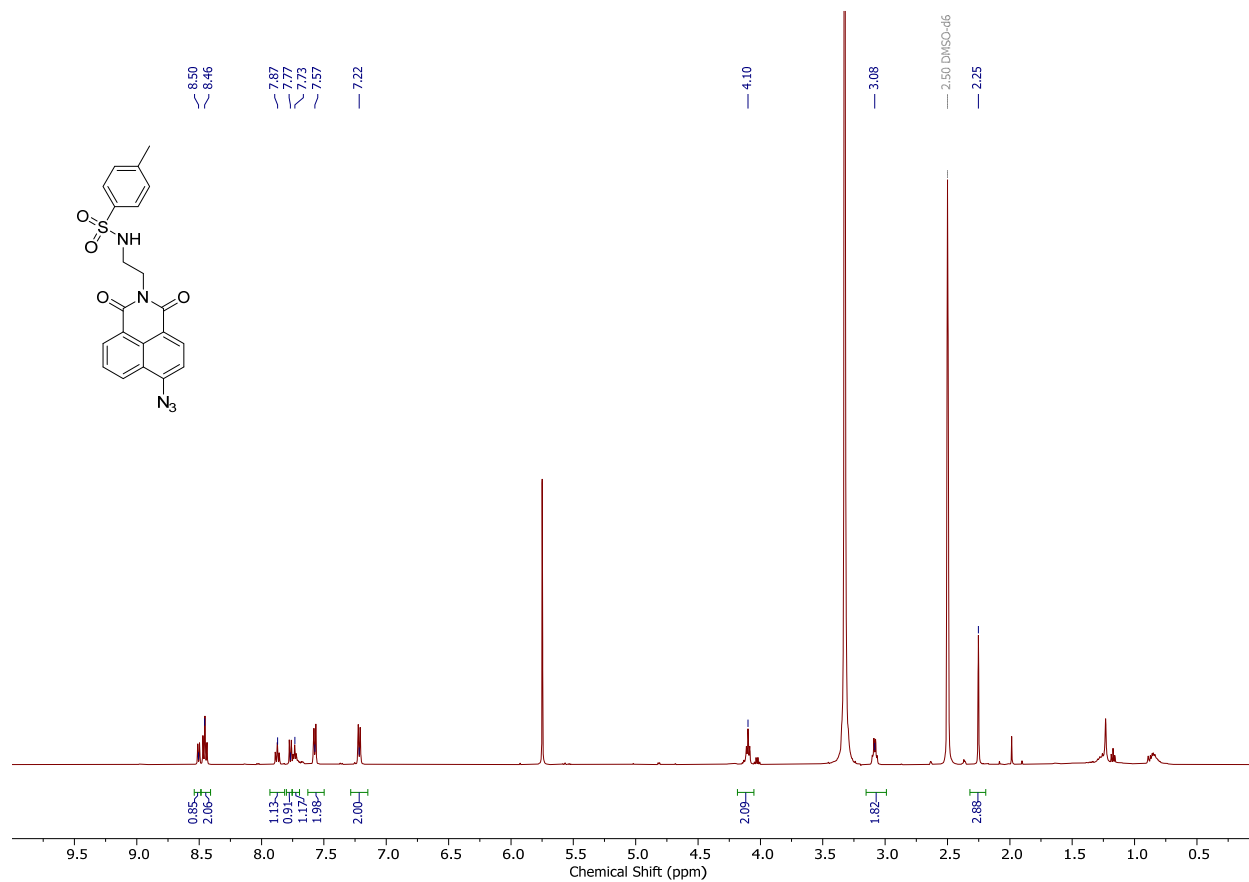

$^1\text{H}$  NMR (500 MHz,  $\text{DMSO-}d_6$ ) spectrum of Golgi-NH.

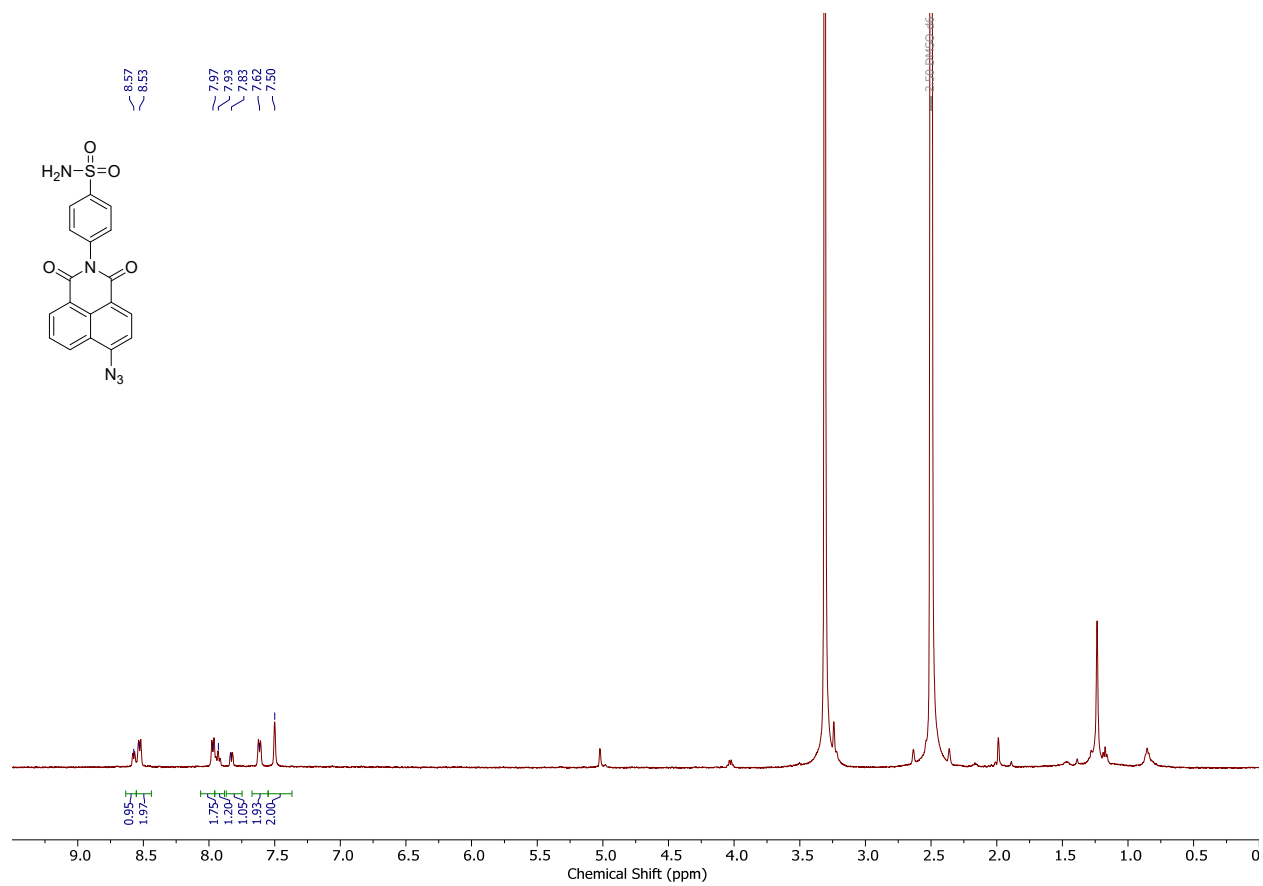

Supplement: NIHMS1868467-supplement-Supporting_Information.pdf [file NIHMS1868467-supplement-Supporting_Information.pdf]
